# Supplementary material for: Zein-Based Films Containing Monolaurin/Eugenol or Essential Oils with Potential for Bioactive Packaging Application
Source: MDPI journal article supplement (doi:10.3390/ijms23010384), 2021-12-29
Supplement: s1 [file s1]

Supplementary material to

## **Zein-based Films Containing Monolaurin/Eugenol or Essential Oils with Perspective for Bioactive Packaging**

Jana Sedlarikova <sup>1,\*</sup>, Magda Janalikova <sup>2,\*</sup>, Pavel Pleva <sup>2</sup>, Lucie Pavlatkova <sup>2</sup>, Antonin Minarik <sup>3,4</sup>, and Petra Peer <sup>2</sup>

<sup>1</sup> Department of Fat, Surfactant and Cosmetics Technology, Faculty of Technology, Tomas Bata University in Zlin, Vavreckova 275, 760 01 Zlin, Czech Republic

<sup>2</sup> Department of Environmental Protection Engineering, Faculty of Technology, Tomas Bata University in Zlin, Vavreckova 275, 760 01 Zlin, Czech Republic

<sup>3</sup> Department of Physics and Materials Engineering, Faculty of Technology, Tomas Bata University in Zlin, Vavreckova 275, 760 01 Zlin, Czech Republic

<sup>4</sup> Centre of Polymer Systems, Tomas Bata University in Zlin, Trida Tomase Bati 5678, 76001 Zlin, Czech Republic

\* Correspondence: sedlarikova@utb.cz; mjanalikova@utb.cz

In this supplementary material, the following figures are presented:

- Figure S1. SEM photographs of zein-based films with active compounds combinations: Z, zein; O, oregano; T, thyme; EU, eugenol; ML, monolaurin; 2: 2 wt%; 3: 3 wt%
- Figure S2. SEM photographs of zein-based films with active compounds combinations: Z, zein; O, oregano; T, thyme; EU, eugenol; ML, monolaurin; 2: 2 wt%; 5: 5 wt%
- Figure S3. Appearance of solvent cast zein-based films.

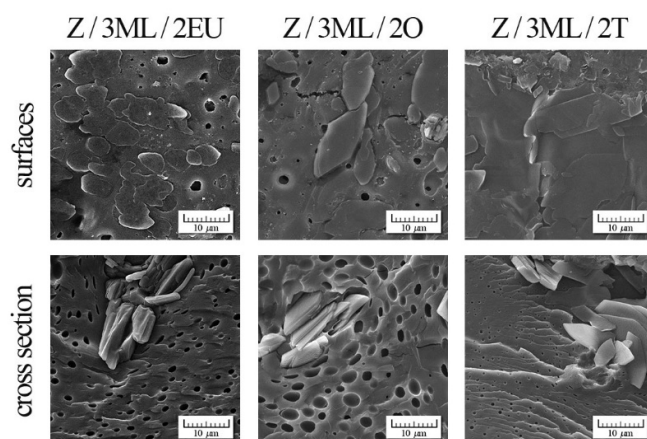

Figure S1. SEM photographs of zein-based films with active compounds combinations: Z, zein; O, oregano; T, thyme; EU, eugenol; ML, monolaurin; 2: 2 wt%; 3: 3 wt%

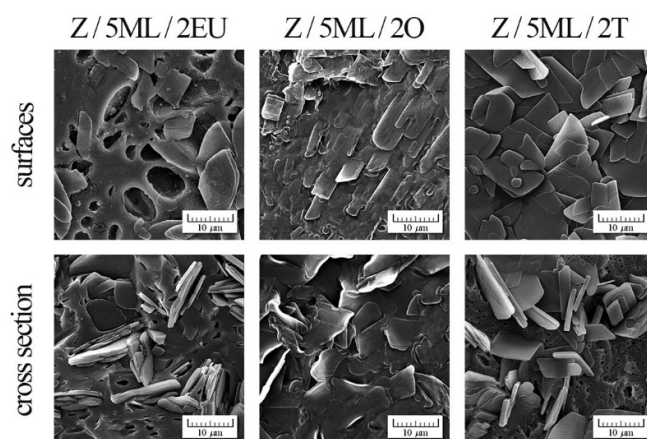

Figure S2. SEM photographs of zein-based films with active compounds combinations: Z, zein; O, oregano; T, thyme; EU, eugenol; ML, monolaurin; 2: 2 wt%; 5: 5 wt%

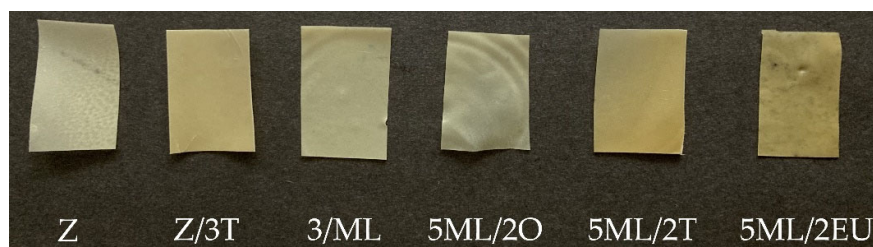

Figure S3. Appearance of solvent cast zein-based films.
